# Supplementary material
Source: PubMed Central journal article supplement (PMC2768931)
Supplement: tpc.109.068239_1.pdf [file tpc.109.068239_1.pdf]

Supplemental Data. Reinheimer and Kellogg (2009). Evolution of *AGL6-like* MADS-box genes in grasses (Poaceae): ovule expression is ancient and palea expression is new

**Supplemental Figure 1.** Differences in amino acid composition between the paralogous copies *OsMADS17* and *OsMADS6*.

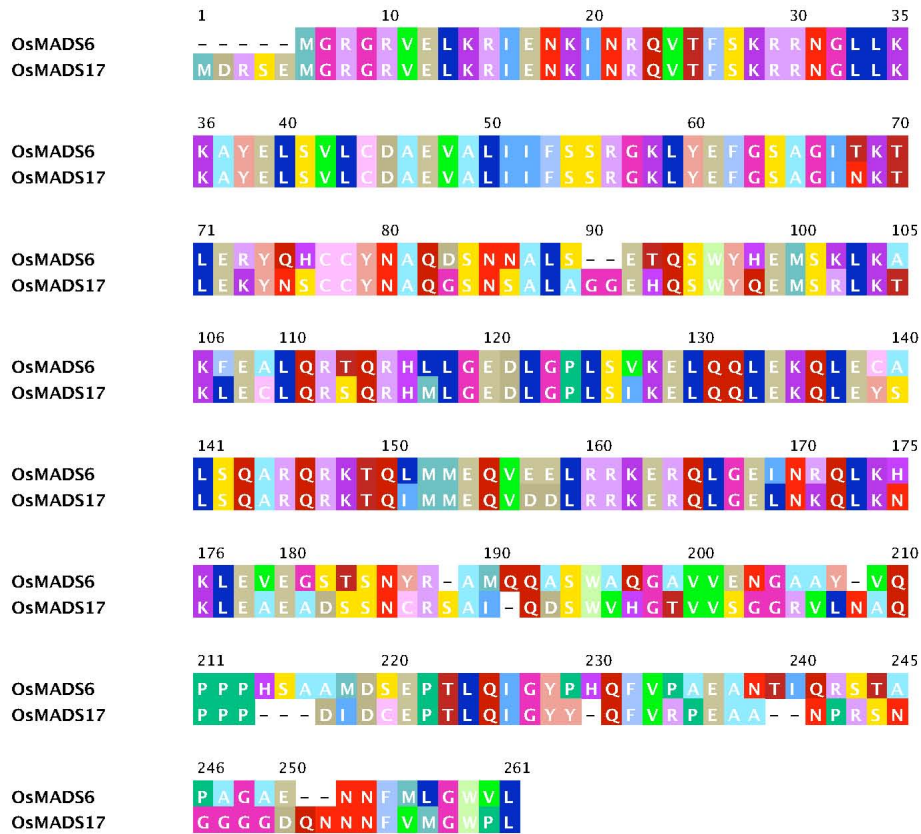

**Supplemental Figure 2.** Alignment of the predicted amino acid sequences of *AGL6*-like genes included in this study (only the IKC-terminus domains are shown). The black arrow indicates the single amino acid in the K-domain changed before the divergence of *Pharus*, which correlates with the origin of the grass spikelet.

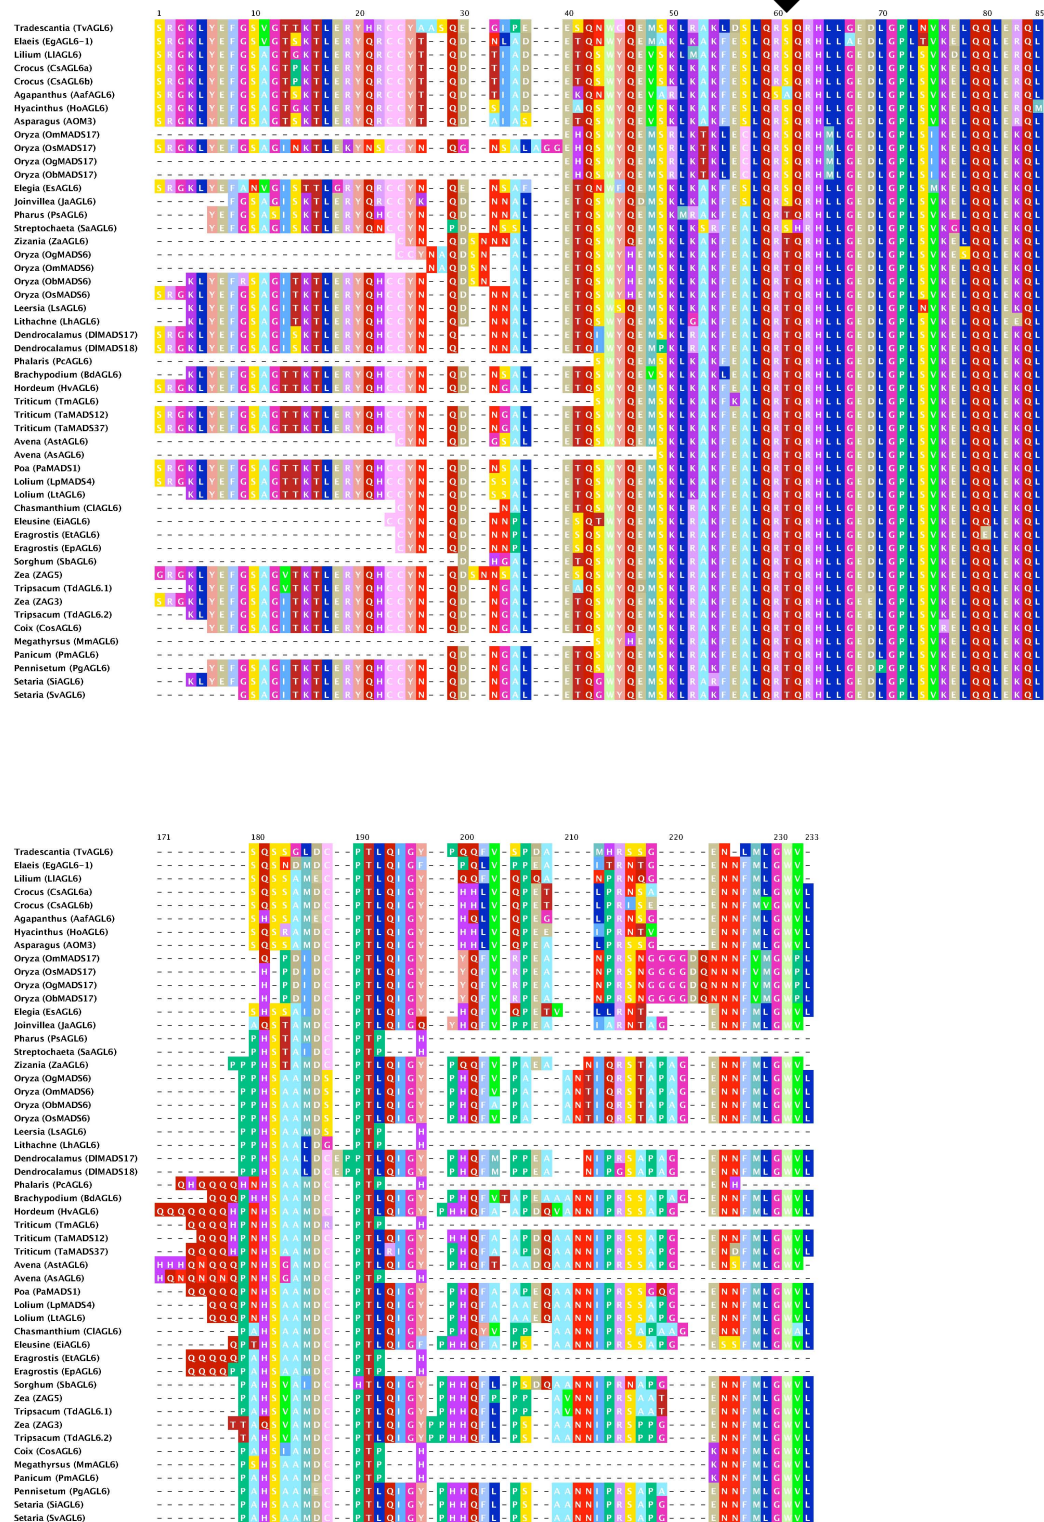

**Supplemental Figure 3.** *AGL6*-like RT-PCR products from RNA of roots (**R**), stems (**S**), leaves (**L**), and inflorescence (**I**) in *Agapanthus africanus* and grasses, and outer tepals (**OT**), inner tepals (**IT**), stamens (**ST**) and carpels (**CA**) in *Agapanthus africanus*. *ACTIN* was used as a positive control. The question mark indicates missing data.

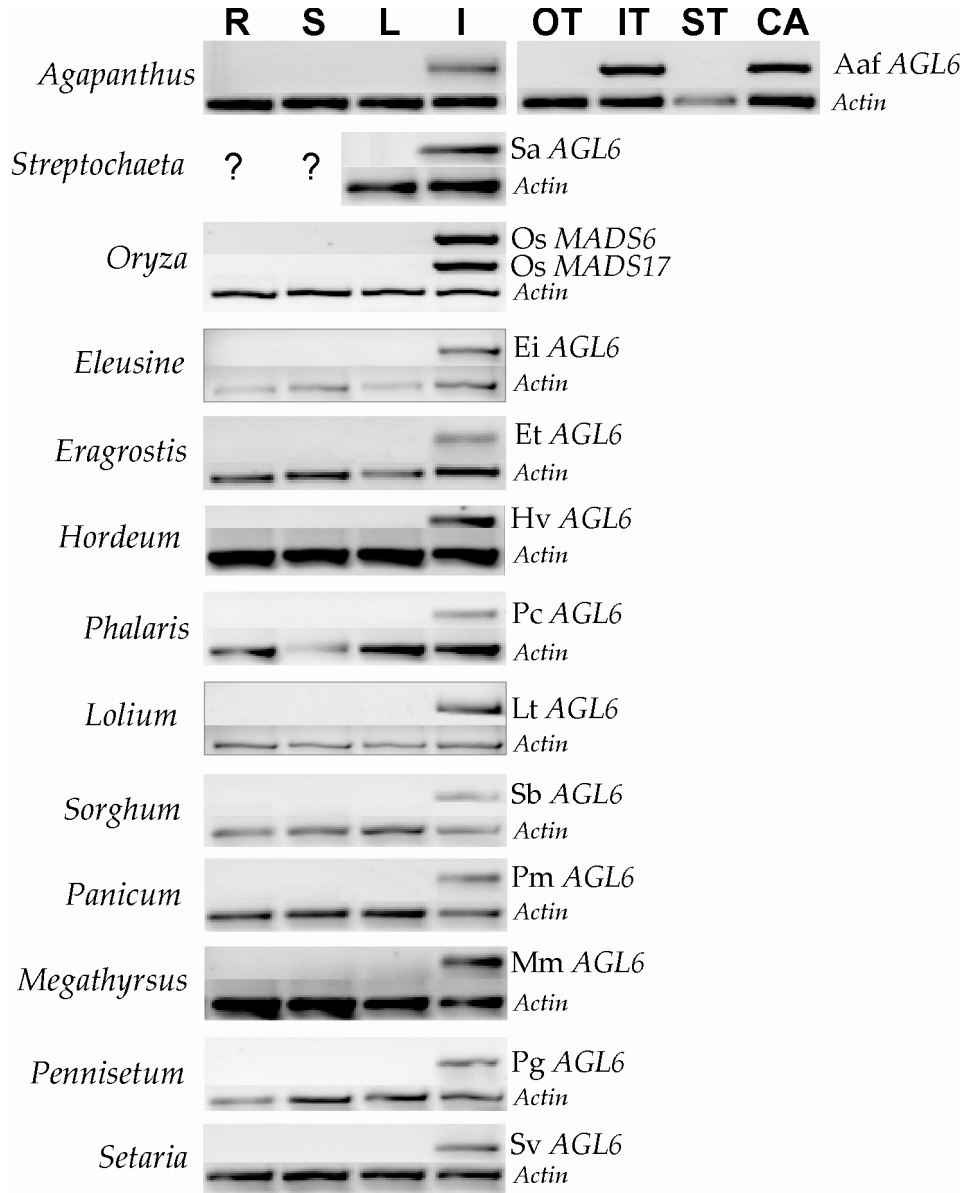

**Supplemental Figure 4.** *AGL6*-like expression in floral meristems of *Streptochaeta angustifolia* (Anomochlooideae), and *Triticum monococcum* (Pooideae). **(A)** Sa *AGL6* in *S. angustifolia*. **(B)** Tm *AGL6* in *T. monococcum*. The arrowhead indicates the floral meristem. Bar = 100 $\mu$ m.

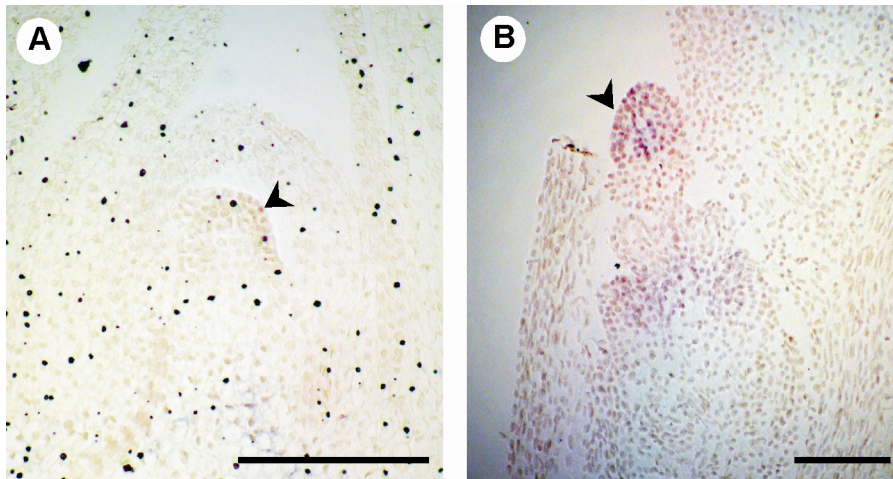

**Supplemental Table 1.** Expression patterns reported for *AGL6-like* homologs in gymnosperm species. Abbreviations: IH, in situ hybridization; RT-PCR, Reverse transcriptase, polymerase chain reaction.

| Species                   | Gene           | Expression      |               |        |                      | Technique           | References                                   |
|---------------------------|----------------|-----------------|---------------|--------|----------------------|---------------------|----------------------------------------------|
|                           |                | Female<br>cones | Male<br>cones | Leaves | Vegetativ<br>e shoot |                     |                                              |
| <i>Gnetum<br/>gnemon</i>  | <i>GMM9</i>    | +               | +             | -      | ?                    | RNA gel<br>blot     | Winter et al. (1999)<br>Becker et al. (2003) |
|                           | <i>GMM11</i>   | +               | +             | -      | ?                    | IH                  |                                              |
| <i>Picea abies</i>        | <i>DAL1</i>    | +               | +             | ?      | +                    | RNA gel<br>blot     | Tandre et al. (1995)                         |
| <i>Pinus<br/>radiata</i>  | <i>PrMADS2</i> | +               | +             | ?      | -                    | RNA gel<br>blot, IH | Mouradov et al. (1998)                       |
|                           | <i>PrMADS3</i> | +               | +             | ?      | +                    |                     |                                              |
| <i>Pinus<br/>resinosa</i> | <i>PMADS1</i>  | +               | +             | ?      | ?                    | RNA gel<br>blot     | Liu and Podila (1997)                        |

**Supplemental Table 2.** *AGL6-like* gene expression patterns reported in eudicots and monocots. Abbreviations: IH, in situ hybridization; MA, microarrays; RQ RT-PCR, Relative Quantitative RT-PCR; RT-PCR, Reverse transcriptase - polymerase chain reaction; DNA gel blot; Veg., vegetative tissues; W1, first whorl or sepals in eudicots, outer tepals in non-grass monocots, and lemma and palea in Grasses; W2, second whorl or petals in eudicots, inner tepals in Non-grasses monocots and lodicules in grasses; W3, third whorl or stamens; W4, fourth whorl or carpels.

| Species                      | Gene              | Expression |    |    |    |       |              | Technique        | References                |
|------------------------------|-------------------|------------|----|----|----|-------|--------------|------------------|---------------------------|
|                              |                   | W1         | W2 | W3 | W4 | Fruit | Veg. tissues |                  |                           |
| <b>Dicots</b>                |                   |            |    |    |    |       |              |                  |                           |
| <i>Arabidopsis</i>           | <i>AGL6</i>       | +          | +  | +  | +  | -     | +            | RNA gel blot     | Ma et al. (1990)          |
|                              | <i>AGL13</i>      | -          | -  | +  | +  | -     | +            | RNA gel blot, IH | Rounsley et al. (1995)    |
| <i>Vitis vinifera</i>        | <i>VvMADS3</i>    | -          | +  | +  | +  | +     | -            | RNA gel blot     | Boss et al. (2002)        |
| <i>Petunia</i>               | <i>pMADS4</i>     | +          | +  | -  | +  | ?     | ?            | RNA gel blot     | Tsuchimoto et al. (2000)  |
| <b>Amborellales</b>          |                   |            |    |    |    |       |              |                  |                           |
| <i>Amborella trichopoda</i>  | <i>Am.tr.AGL6</i> | +          | +  | +  | +  | ?     | -            | RQ RT-PCR        | Kim et al. (2005)         |
| <b>Magnoliales</b>           |                   |            |    |    |    |       |              |                  |                           |
| <i>Magnolia grandiflora</i>  | <i>Ma.gr.AGL6</i> | +          | +  | -  | -  | ?     | -            | RQ RT-PCR        | Kim et al. (2005)         |
| <i>Persea americana</i>      | <i>AGL6.1</i>     | +          | +  | -  | -  | ?     | -            | RQ RT-PCR        | Chanderbali et al. (2006) |
| <i>Persea borbonia</i>       | <i>AGL6.2</i>     | +          | +  | -  | -  | ?     | -            |                  |                           |
| <b>Non-grass monocots</b>    |                   |            |    |    |    |       |              |                  |                           |
| <i>Asparagus officinalis</i> | <i>AOM3</i>       | +          | +  | +  | +  | ?     | -            | RNA gel blot, IH | Losa et al. (2004)        |

|                              |                  |   |   |   |   |   |   |                            |                            |
|------------------------------|------------------|---|---|---|---|---|---|----------------------------|----------------------------|
| <i>Oncidium Gower Ramsey</i> | O <i>MADS1</i>   | - | + | - | + | ? | - | RT-PCR,<br>DNA gel<br>blot | Hsu et al. (2003)          |
| <i>Hyacinthus orientalis</i> | Ho <i>AGL6</i>   | + | + | - | + | ? | - | RNA gel<br>blot            | Fan et al. (2007)          |
| <b>Grasses</b>               |                  |   |   |   |   |   |   |                            |                            |
| <i>Oryza sativa</i>          | Os <i>MADS6</i>  | + | + | - | + | ? | - | RNA gel                    | Moon et al. (1999)         |
|                              |                  | - | - | - | + | ? | ? | blot                       | Pelucchi et al. (2002)     |
|                              | Os <i>MADS17</i> | ? | ? | ? | ? | ? | - | IH<br>MA                   | Arora et al. (2007)        |
| <i>Lolium perenne</i>        | Lp <i>MADS4</i>  | - | ? | ? | ? | ? | - | RQ RT-<br>PCR              | Petersen et al. (2004)     |
| <i>Triticum aestivum</i>     | Ta <i>MADS37</i> | ? | ? | ? | ? | + | - | RT-PCR                     | Zhao et al. (2006)         |
| <i>Poa annua</i>             | Pa <i>MADS1</i>  | - | ? | ? | ? | ? | - | RNA gel<br>blot            | Aiguo and Griffin (2002)   |
| <i>Zea mays</i>              | <i>zag3</i>      | + | + | - | + | ? | - | RNA gel                    | Mena et al. (1995)         |
|                              |                  | + | + | - | + | ? | ? | blot                       | Thompson et al (submitted) |
|                              | <i>zag5</i>      | - | - | - | + | ? | - | IH<br>RNA gel<br>blot      | Mena et al. (1995)         |

---

**Supplemental Table 3.** *AGL6* homologs included in this study

| <i>Species</i>                    | Family/Subfamily        | Gene             | Accession no                                  |
|-----------------------------------|-------------------------|------------------|-----------------------------------------------|
| <i>Crocus sativus</i>             | Iridaceae/—             | Cs <i>AGL6a</i>  | EF041505                                      |
|                                   |                         | Cs <i>AGL6b</i>  | EF041506                                      |
| <i>Lilium lancifolium</i>         | Liliaceae/—             | Ll <i>AGL6</i>   | <u>GQ496626</u>                               |
| <i>Hyacinthus orientalis</i>      | Hyacinthaceae/—         | Ho <i>AGL6</i>   | AY591333                                      |
| <i>Asparagus officinalis</i>      | Asparagaceae/—          | Ao <i>M3</i>     | AY383559.1                                    |
| <i>Agapanthus africanus</i>       | Agapanthaceae/—         | Aaf <i>AGL6</i>  | <u>GQ496627</u>                               |
| <i>Elaeis guineensis</i>          | Arecaceae/—             | Eg <i>AGL6-1</i> | AY739701                                      |
| <i>Tradescantia virginiana</i>    | Commelinaceae/—         | Tv <i>AGL6</i>   | <u>GQ496625</u>                               |
| <i>Elegia sp</i>                  | Restionaceae/—          | Es <i>AGL6</i>   | Malcomber and<br>Christensen<br>(unpublished) |
| <i>Joinvillea ascendens</i>       | Joinvilleaceae/—        | Ja <i>AGL6</i>   | <u>GQ496631</u>                               |
| <i>Streptochaeta angustifolia</i> | Poaceae/Anomochlooideae | Sa <i>AGL6</i>   | <u>GQ496633</u>                               |
| <i>Pharus sp.</i>                 | Poaceae/Pharoideae      | Ps <i>AGL6</i>   | <u>GQ496632</u>                               |
| <i>Dendrocalamus latiflorus</i>   | Poaceae/Bambusoideae    | Dl <i>MADS17</i> | AY599754.1                                    |
|                                   |                         | Dl <i>MADS18</i> | AY599755.1                                    |
| <i>Lithachne humilis</i>          | Poaceae/Bambusoideae    | Lh <i>AGL6</i>   | <u>GQ496639</u>                               |
| <i>Oryza sativa</i>               | Poaceae/Ehrhartoideae   | Os <i>MADS6</i>  | U78782.1                                      |
|                                   |                         | Os <i>MADS17</i> | AF109153.1                                    |
| <i>Oryza barthii</i>              | Poaceae/Ehrhartoideae   | Ob <i>MADS6</i>  | <u>GQ496637</u>                               |
|                                   |                         | Ob <i>MADS17</i> | <u>GQ496630</u>                               |
| <i>Oryza glaberrima</i>           | Poaceae/Ehrhartoideae   | Og <i>MADS6</i>  | <u>GQ496635</u>                               |
|                                   |                         | Og <i>MADS17</i> | <u>GQ496629</u>                               |
| <i>Oryza meridionalis</i>         | Poaceae/Ehrhartoideae   | Om <i>MADS6</i>  | <u>GQ496636</u>                               |
|                                   |                         | Om <i>MADS17</i> | <u>GQ496628</u>                               |
| <i>Leersia sp.</i>                | Poaceae/Ehrhartoideae   | Ls <i>AGL6</i>   | <u>GQ496638</u>                               |
| <i>Zizania aquatica</i>           | Poaceae/Ehrhartoideae   | Za <i>AGL6</i>   | <u>GQ496634</u>                               |
| <i>Brachypodium distachyon</i>    | Poaceae/Pooideae        | Bd <i>AGL6</i>   | <u>GQ496641</u>                               |
| <i>Triticum aestivum</i>          | Poaceae/Pooideae        | Ta <i>MADS37</i> | DQ512353.1                                    |
|                                   |                         | Ta <i>MADS12</i> | AB007505.1                                    |



|                                |                         |                  |                 |
|--------------------------------|-------------------------|------------------|-----------------|
| <i>Triticum monococcum</i>     | Poaceae/Pooideae        | Tm <i>AGL6</i>   | <u>GQ496643</u> |
| <i>Hordeum vulgare</i>         | Poaceae/Pooideae        | Hv <i>AGL6</i>   | <u>GQ496642</u> |
| <i>Lolium temulentum</i>       | Poaceae/Pooideae        | Lt <i>AGL6</i>   | <u>GQ496646</u> |
| <i>Lolium perenne</i>          | Poaceae/Pooideae        | Lp <i>MADS4</i>  | AY198329.1      |
| <i>Phalaris canariensis</i>    | Poaceae/Pooideae        | Pc <i>AGL6</i>   | <u>GQ496640</u> |
| <i>Avena strigosa</i>          | Poaceae/Pooideae        | Ast <i>AGL6</i>  | <u>GQ496644</u> |
| <i>Avena sativa</i>            | Poaceae/Pooideae        | As <i>AGL6</i>   | <u>GQ496645</u> |
| <i>Poa annua</i>               | Poaceae/Pooideae        | Pa <i>MADS1</i>  | AF372840.1      |
| <i>Eleusine indica</i>         | Poaceae/Chloridoideae   | Ei <i>AGL6</i>   | <u>GQ496648</u> |
| <i>Eragrostis pilosa</i>       | Poaceae/Chloridoideae   | Ep <i>AGL6</i>   | <u>GQ496650</u> |
| <i>Eragrostis tef</i>          | Poaceae/Chloridoideae   | Et <i>AGL6</i>   | <u>GQ496649</u> |
| <i>Chasmanthium latifolium</i> | Poaceae/Centothecoideae | Cl <i>AGL6</i>   | <u>GQ496647</u> |
| <i>Setaria viridis</i>         | Poaceae/Panicoideae     | Sv <i>AGL6</i>   | <u>GQ496659</u> |
| <i>Setaria italica</i>         | Poaceae/Panicoideae     | Si <i>AGL6</i>   | <u>GQ496658</u> |
| <i>Pennisetum glaucum</i>      | Poaceae/Panicoideae     | Pg <i>AGL6</i>   | <u>GQ496657</u> |
| <i>Megathyrsus maximus</i>     | Poaceae/Panicoideae     | Mm <i>AGL6</i>   | <u>GQ496655</u> |
| <i>Panicum miliaceum</i>       | Poaceae/Panicoideae     | Pm <i>AGL6</i>   | <u>GQ496656</u> |
| <i>Sorghum bicolor</i>         | Poaceae/Panicoideae     | Sb <i>AGL6</i>   | <u>GQ496651</u> |
| <i>Zea mays</i>                | Poaceae/Panicoideae     | ZAG3             | NM_001111862.1  |
|                                |                         | ZAG5             | NM_001112222.1  |
| <i>Tripsacum dactyloides</i>   | Poaceae/Panicoideae     | Td <i>AGL6.1</i> | <u>GQ496652</u> |
|                                |                         | Td <i>AGL6.2</i> | <u>GQ496653</u> |
| <i>Coix sp.</i>                | Poaceae/Panicoideae     | Cos <i>AGL6</i>  | <u>GQ496654</u> |

Voucher information for each sequence is included in GenBank. Newly generated sequences are underlined.

**Supplemental Table 4.** Primers used for isolation of Os *MADS6*-like sequences and Os *MADS17*-like sequences, and expression analysis in Poaceae and other monocots.

| Method                                              | Species                           | Primer           | Primer sequence                     |
|-----------------------------------------------------|-----------------------------------|------------------|-------------------------------------|
| <b>Isolation of Os <i>MADS6</i>-like genes</b>      |                                   |                  |                                     |
|                                                     | <i>Lilium lancifolium</i>         | 147F             | SAG CCG HGG CAA RCT CTA             |
|                                                     | <i>Agapanthus africanus</i>       | 147F             | SAG CCG HGG CAA RCT CTA             |
|                                                     | <i>Tradescantia virginiana</i>    | 147F             | SAG CCG HGG CAA RCT CTA             |
|                                                     | <i>Xyris sp.</i>                  | 147F             | SAG CCG HGG CAA RCT CTA             |
|                                                     | <i>Joinvillea ascendens</i>       | 163F             | TAC GAR TTC GGY AGC GCC             |
|                                                     | <i>Streptochaeta angustifolia</i> | 163F             | TAC GAR TTC GGY AGC GCC             |
|                                                     | <i>Pharus sp.</i>                 | 163F             | TAC GAR TTC GGY AGC GCC             |
|                                                     | <i>Oryza barthii</i>              | 157F             | AAG CTS TAC GAR TTC GGY AG          |
|                                                     | <i>Oryza glaberrima</i>           | 215F             | GYT GCT AYA ATG CTC AAG ATT CC      |
|                                                     | <i>Oryza meridionalis</i>         | 215F             | GYT GCT AYA ATG CTC AAG ATT CC      |
|                                                     | <i>Lithachne humilis</i>          | 157F             | AAG CTS TAC GAR TTC GGY AG          |
|                                                     | <i>Leersia sp.</i>                | 157F             | AAG CTS TAC GAR TTC GGY AG          |
|                                                     | <i>Zizania aquatica</i>           | 157F             | AAG CTS TAC GAR TTC GGY AG          |
|                                                     | <i>Brachypodium distachyon</i>    | 157F             | AAG CTS TAC GAR TTC GGY AG          |
|                                                     | <i>Triticum monococcum</i>        | 270F             | GAG YTG GTA CCA KGA AAT GTC AAA     |
|                                                     | <i>Lolium temulentum</i>          | 157F             | AAG CTS TAC GAR TTC GGY AG          |
|                                                     | <i>Phalaris canariensis</i>       | 270F             | GAG YTG GTA CCA KGA AAT GTC AAA     |
|                                                     | <i>Avena strigosa</i>             | 215F             | GYT GCT AYA ATG CTC AAG ATT CC      |
|                                                     | <i>Avena sativa</i>               | 270F             | GAG YTG GTA CCA KGA AAT GTC AAA     |
|                                                     | <i>Eleusine indica</i>            | 215F             | GYT GCT AYA ATG CTC AAG ATT CC      |
|                                                     | <i>Eragrostis pilosa</i>          | 215F             | GYT GCT AYA ATG CTC AAG ATT CC      |
|                                                     | <i>Eragrostis tef</i>             | 215F             | GYT GCT AYA ATG CTC AAG ATT CC      |
|                                                     | <i>Chasmanthium latifolium</i>    | 215F             | GYT GCT AYA ATG CTC AAG ATT CC      |
|                                                     | <i>Setaria viridis</i>            | 157F             | AAG CTS TAC GAR TTC GGY AG          |
|                                                     | <i>Setaria italica</i>            | 157F             | AAG CTS TAC GAR TTC GGY AG          |
|                                                     | <i>Pennisetum glaucum</i>         | 163F             | TAC GAR TTC GGY AGC GCC             |
|                                                     | <i>Megathyrsus maximus</i>        | 270F             | GAG YTG GTA CCA KGA AAT GTC AAA     |
|                                                     | <i>Panicum miliaceum</i>          | 270F             | GAG YTG GTA CCA KGA AAT GTC AAA     |
|                                                     | <i>Sorghum bicolor</i>            | 270F             | GAG YTG GTA CCA KGA AAT GTC AAA     |
|                                                     | <i>Tripsacum dactyloides</i>      | 157F             | AAG CTS TAC GAR TTC GGY AG          |
|                                                     | <i>Coix sp.</i>                   | 163F             | TAC GAR TTC GGY AGC GCC             |
| <b>Isolation of Os <i>MADS17</i>-like sequences</b> |                                   |                  |                                     |
|                                                     |                                   | 150F             | CCG TGG CAA ACT GTA TGA ATT         |
|                                                     |                                   | 177F             | CGC GGG CAT TAA CAA AAC             |
|                                                     |                                   | 192F             | AAC CCT GGA AAA ATA TAA CAG CTG     |
|                                                     |                                   | 257F             | GCG AAC ATC AGA GCT GGT ATC         |
|                                                     |                                   | 157F             | AAG CTS TAC GAR TTC GGY AG          |
|                                                     |                                   | 163F             | TAC GAR TTC GGY AGC GCC             |
|                                                     |                                   | 650R             | CGC ACA AAC TGA TAA TAG CCA A       |
|                                                     |                                   | 711R             | ATC ACA AAG TTG TTG TTC TGA TCG     |
|                                                     |                                   | 714R             | TCA GAA CAA CAA CTT TGT GAT GG      |
|                                                     |                                   | 725R             | ACT TTG TGA TGG GCT GGC             |
|                                                     |                                   |                  | CCG GAT CCT CTA GAG CGG CCG CTT TTT |
|                                                     |                                   | polyT            | TTT TTT TTT TTT                     |
| <b>Q-PCR</b>                                        |                                   |                  |                                     |
|                                                     |                                   | ACTIN591F        | GAG RGG TTA CTC CTT CAC VAC         |
|                                                     |                                   | 764R             | GGA CCT CGG GGC ACC TGA ACC TCT     |
|                                                     | <i>Streptochaeta angustifolia</i> | StrepAGL6_1F     | TGC TAT TCT ATA CCT AAG TCG TTG GA  |
|                                                     |                                   | Strep_3UTR       | TTA TAC CCA CCT TGG ATG TCG         |
|                                                     | <i>Oryza sativa</i>               | OsMADS6_2F       | TCT GTA GTT GCT GGT GGA ACC         |
|                                                     |                                   | OSMADS6_5CT113   | ATT ATT AGC CCC AAC TTC TGA CAG     |
|                                                     |                                   | OsMADS17_1F      | CGT GCT ATA ATA TAT AGT TCG GCA AA  |
|                                                     |                                   | OSMADS17_3UTR451 | CAA ACA TAC ACT CAT AGG TAC GTG C   |
|                                                     | <i>Eleusine indica</i>            | EiAGL6_2F        | TTT GAC CTA CAG ATC CAT CCG         |
|                                                     |                                   | Ei3UTR           | ACG ACC ACA CAA TCA CGG T           |

**RT-PCR and in situ hybridization**

|                                   |                                                                                                                       |                                                                                                                                                                                                                                              |
|-----------------------------------|-----------------------------------------------------------------------------------------------------------------------|----------------------------------------------------------------------------------------------------------------------------------------------------------------------------------------------------------------------------------------------|
| <i>Lolium temulentum</i>          | LtAGL6_1F<br>Lt3UTR                                                                                                   | CTA ATA AAA TGC GTG TTC TGC TTC T<br>TTC AAA TAA TCA AAA CGT AGA AGT GG                                                                                                                                                                      |
| <i>Setaria italica</i>            | SiAGL6_1F<br>Seta3UTR                                                                                                 | TTC TAT GTG ATT GTA TTG TGG CAC TT<br>ATA CGT ACC GGT AGA GAT AAT TTT GG                                                                                                                                                                     |
| <i>Sorghum bicolor</i>            | SbAGL6_2F<br>Sb3UTR                                                                                                   | GTG GTG TGG CAC TTC TAT GTT TT<br>ATA AGT ACC GTT GCA GAT AAT TTT GG                                                                                                                                                                         |
| <i>Triticum monoccocum</i>        | TmAGL6_1F<br>Tri_3UTR                                                                                                 | TCG TTA TTT GTG CGT GTA AGA AGTA<br>GCA TGC ATG GAT AGC TTG G                                                                                                                                                                                |
| <i>Agapanthus africanus</i>       | 147F<br>559r                                                                                                          | SAG CCG HGG CAA RCT CTA<br>CCC AGC CCA GCA TAA AGT T                                                                                                                                                                                         |
| <i>Joinvillea ascendens</i>       | JO_5CT158<br>JO23_3UTR<br>Jo5CT<br>JO32_3UTR                                                                          | CTC TGC AAA TTG GGC AGT ATC<br>AGA GCT TAA ATT TTA CAA GGT CC<br>GGA GAA ATT AAC AAA CAA CTC AAA AAC<br>TTT TTG GCA GTC AAG GGA ATA                                                                                                          |
| <i>Streptochaeta angustifolia</i> | Strep_5CT270<br>Strep_5CT<br>Strep_3UTR                                                                               | CGT AGA CTG AGT TTA TCT GCC TAG C<br>TAA CAG GCA GCT CAA AAA CAA G<br>TTA TAC CCA CCT TGG ATG CCG                                                                                                                                            |
| <i>Lithachne humilis</i>          | LITHA_5CT316<br>Litha_181_3UTR                                                                                        | GTG GGT TCT TTA AGC TTG CTT G<br>TTT GAG TTG CTA GGG AAT TTG AA                                                                                                                                                                              |
| <i>Oryza sativa</i>               | OsMADS6_5CT<br>OSMADS6_5CT113<br>OsMADS6_3UTR<br>OSMADS17_5CT100<br>OSMADS17_3UTR451<br>OsMADS17_5CT<br>OsMADS17_3UTR | CTG GGT GAA ATT AAT AGG CAA CTC<br>ATT ATT AGC CCC AAC TTC TGA CAG<br>CAG CTA GCA GTA GCT TAC ACA CAA A<br>AAG CTA GAA GCT GAA GCC GAT A<br>CAA ACA TAC ACT CAT AGG TAC GTG C<br>CAG GCT CGA CAA CGA AAG A<br>ACC GGA TAG GGG AGA AAT ATA CA |
| <i>Leersia sp.</i>                | LE_5CT202<br>Le_3UTR                                                                                                  | CGG CCA TGG ACT CTG AAC<br>AAA CAC AGC CAC GTA CGT AGA AC                                                                                                                                                                                    |
| <i>Hordeum vulgare</i>            | Hv5CT<br>Hv3UTR                                                                                                       | GCG TCA GCT GGG AGA CAT<br>AAT TGT CCA GAA ATT ATG GTT GTA CT                                                                                                                                                                                |
| <i>Triticum monococum</i>         | Tri_5CT<br>Tri_3UTR                                                                                                   | GGC AGC AAC AGC AAC AAC TA<br>GCA TGC ATG GAT AGC TTG G                                                                                                                                                                                      |
| <i>Lolium temulentum</i>          | Lt5CT<br>Lt3UTR                                                                                                       | CAG CAG CAG CCA AAT CAC T<br>TTC AAA TAA TCA AAA CGT AGA AGT GG                                                                                                                                                                              |
| <i>Phalaris canariensis</i>       | 270F<br>805R                                                                                                          | GAG YTG GTA CCA KGA AAT GTC AAA<br>TTC ATG CTG GGR TGG GTT                                                                                                                                                                                   |
| <i>Eleusine indica</i>            | Ei5CT<br>Ei3UTR                                                                                                       | TGG GAG AAA TGA ACA GGC A<br>ACG ACC ACA CAA TCA CGG T                                                                                                                                                                                       |
| <i>Eragrostis tef</i>             | 270F<br>805R                                                                                                          | GAG YTG GTA CCA KGA AAT GTC AAA<br>TTC ATG CTG GGR TGG GTT                                                                                                                                                                                   |
| <i>Setaria viridis</i>            | Seta5CT<br>Seta3UTR                                                                                                   | GAG AAA TGA ACA GGC AAC TCA AG<br>ATA CGT ACC GGT AGA GAT AAT TTT GG                                                                                                                                                                         |
| <i>Setaria italica</i>            | Seta5CT<br>Seta3UTR                                                                                                   | GAG AAA TGA ACA GGC AAC TCA AG<br>ATA CGT ACC GGT AGA GAT AAT TTT GG                                                                                                                                                                         |
| <i>Pennisetum glaucum</i>         | Pg5CT<br>Pg3UTR                                                                                                       | GTC ACC TGG GAG AAA TGA ACA<br>CGG CAG CAT AGA AGT ATT TTT ACA                                                                                                                                                                               |
| <i>Megathyrsus maximus</i>        | 270F<br>805R                                                                                                          | GAG YTG GTA CCA KGA AAT GTC AAA<br>TTC ATG CTG GGR TGG GTT                                                                                                                                                                                   |
| <i>Sorghum bicolor</i>            | Sb5CT<br>Sb3UTR                                                                                                       | GAA CAG GCA ACT CAA ACA CAA G<br>ATA AGT ACC GTT GCA GAT AAT TTT GG                                                                                                                                                                          |

## Statistical tests

### Statistical tests of nucleotide sequences (tabulated results at Supplemental Table 5 bellow)

We performed a Shimodaira–Hasegawa (SH) test (Goldman et al. 2000) to test whether we could statistically reject alternative hypotheses for the timing of the *AGL6/Os MADS6/Os MADS17* duplication and the *zag3/zag5* duplication.

We tested whether the duplication could have taken place at the base of the grasses after the divergence of Joinvilleaceae. Also, we explored alternative hypothesis for the *Os MADS6/Os MADS17* duplications based on previous studies that suggested that the two copies are the result of rice genome duplication event (Arora et al., 2007). Each topology differed in the placement of *Oryza MADS17* sequences as follows: (1) *Oryza MADS17-like* sequences sister to the *Oryza MADS6* clade (testing whether the duplication could have occurred just prior to the origin of the genus *Oryza*), (2) *Oryza MADS17-like* sequences sister to the Oryzeae clade sequences (testing whether the duplication could have occurred just prior to the origin of the tribe Oryzeae), (3) *Oryza MADS17-like* sequences sister to the Ehrhartoideae (testing whether the duplication could have occurred just prior to the origin of the subfamily Ehrhartoideae), (4) *Oryza MADS17-like* sequences sister to the grass family (testing whether the duplication could have occurred just prior to the origin of the grasses), (5) *Oryza MADS17-like* sequences sister to the BEP clade (testing whether the duplication could have occurred just prior to the common ancestor of Bambusoideae, Ehrhartoideae, and Pooideae).

In addition, phylogenetic analysis could not determine precisely when the duplication of *zag3/Td AGL6.2* and *zag5/Td AGL6.1* happened. We tested whether *zag3/Td AGL6.1* and *zag5/Td AGL6.2* genes are sister taxa, meaning that the duplication occurred prior the divergence of maize and *Tripsacum*.

A priori constraint trees were created in MacClade (Maddison and Maddison 2003). Each constraint tree was tested against the unconstrained ML phylogeny using PAUP\* version 4.0b10 (Swofford 2001). The SH test was performed using 1000 bootstrap replicates and the REL (resampling estimated log likelihoods) option.

### Tests for positive selection (tabulated results at Supplemental Tables 6-9 bellow)

The tests are based on estimates of the ratio of non-synonymous to synonymous substitutions (dN/dS, or  $\omega$ ). If this ratio is appreciably less than 1, then we infer that the

protein has been subject to purifying selection, such that mutations causing amino acid changes have been selectively eliminated. If the ratio is near 1, we infer that selection pressures are relaxed, and if the ratio is greater than 1, we infer that there has been selection for diversification (positive selection).

The best-supported tree obtained from Bayesian inference analysis was pruned to include only full-length sequences, and likelihood scores were calculated and statistically compared using the program *codeml* from the PAML package, version 4 (Yang, 2007). PAML calculates the likelihood of the data given the tree under a set of increasingly complex models of evolution. We began with the simplest model ( $M_0$ ), which calculates a single  $\omega$  ratio averaged over the entire tree (Yang et al., 1998). We compared this to a set of models that allow the  $\omega$  ratio to vary among sites (among codons or amino acids in the protein) (Nielsen and Yang 1998; Yang et al. 2000). Model 1a assumes two site classes with  $0 < \omega_0 < 1$  and  $\omega_1 = 1$ , Model 2a is like 1a but also assumes positive selection, Model 3 uses three site classes, Model 7 assumes variable selection among sites, and Model 8 is like Model 7, but with the addition of positive selection. We repeated this set of tests on an alignment including all sequences but excluding the MADS box, and on another alignment including only the C terminus of all sequences.

We also wanted to test for positive selection on particular branches of the *AGL6-like* gene tree. In particular, we were interested in testing for positive selection along all branches subsequent the *AGL6/Os MADS6* and *Os MADS17*. For this test we used the following models that incorporate heterogeneity over sites and branches: Model A (assumes  $0 < \omega_0 < 1$  estimated from the data and  $\omega_1 = 1$ ) and Model B (determines  $\omega_0$  and  $\omega_1$  as free parameters estimated from the data). We tested the data set that included only the IKC regions and excluded the MADS-box, which we had shown to be largely invariant.

Models were compared using the likelihood ratio test statistic ( $2\Delta \ln L$ ).

### **Tajima's relative rate test (tabulated results at Supplemental Tables 10 bellow)**

To test whether *Os MADS17/Os MADS6*, as well as *zag5/zag3* duplicates show differences in evolutionary rates, we used the test proposed by Tajima (1993) using MEGA4 (Tamura et al., 2007). This method compares three sequences, where one of them is an outgroup sequence. The test compares the identical sites in all three

sequences ( $m_{iii}$ ), the divergent sites in all three sequences ( $m_{ijk}$ ), the unique differences in sequence A ( $m_{ijj}$ ), the unique differences in sequence B and the unique differences in the outgroup sequence. Statistical significance among these is assessed under the  $\chi^2$  distribution. We compared the evolutionary rate between Os *MADS17* vs. Os *MADS6* and *zag5* vs. *zag3* using Es *AGL6* and Os *MADS6* as outgroups, respectively.

**Supplemental Table 5.** Results of the Shimodaira-Hasegawa test performed to evaluate whether we could statistically reject alternative hypotheses for the timing of the *Os MADS6*/*Os MADS17* duplication and *ZAG3*/*ZAG5* duplication. Statistically worse trees as compared to the best tree are marked with an asterisk (\*), and *P* values < 0.05.

| Tree                                                                            | -ln Likelihood | Difference from best tree (-ln <i>L</i> ) | <i>P</i> value |
|---------------------------------------------------------------------------------|----------------|-------------------------------------------|----------------|
| Likelihood tree (GTR+I+G)                                                       | 8550.63754     | (best)                                    |                |
| <i>Oryza MADS17</i> -like sequences sister to <i>Oryza MADS6</i> clade          | 8586.81569     | 36.17815                                  | 0.000*         |
| <i>Oryza MADS17</i> -like sequences sister to the Oryzeae clade sequences       | 8579.31828     | 28.68074                                  | 0.004*         |
| <i>Oryza MADS17</i> -like sequences sister to the Ehrhartoideae subfamily       | 8572.32382     | 21.68628                                  | 0.020*         |
| <i>Oryza MADS17</i> -like sequences sister to the grass family                  | 8551.18172     | 0.54418                                   | 0.691          |
| <i>Oryza MADS17</i> -like sequences sister to the BEP clade                     | 8572.40916     | 21.77162                                  | 0.020*         |
| <i>zag3</i> /Td <i>AGL6.1</i> and <i>zag5</i> /Td <i>AGL6.2</i> are sister taxa | 8551.78152     | 1.14398                                   | 0.327          |

**Supplemental Table 6.** Likelihoods and estimated parameters under different site models of codon substitution using the pruned data set with sequences that expand the MIKC regions. Abbreviations:  $-\ln L$ , log likelihood,  $p$ , parameter; Kappa (ts/tv), transition/transversion ratio; NA, non applicable;  $\omega$ , dN/dS value calculated under each model and applied to all branches in the phylogeny. Parameters in parenthesis are not free parameters.

| <b>Model</b>      | <b><math>p</math></b> | <b><math>-\ln L</math></b> | <b>Kappa (ts/tv)</b> | <b><math>\omega</math></b> | <b>Additional Parameters Calculated</b>                                                                         |
|-------------------|-----------------------|----------------------------|----------------------|----------------------------|-----------------------------------------------------------------------------------------------------------------|
| 0                 | 1                     | -4129.210037               | 2.72999              | 0.0954                     | NA                                                                                                              |
| 1a (neutral)      | 2                     | -4245.967313               | 2.69268              | 0.4632                     | $p_0 = 0.53680, (p_1 = 0.46320)$                                                                                |
| 2a (positive)     | 4                     | -4245.967313               | 2.69267              | 0.4632                     | $p_0 = 0.53682, p_1 = 0.46318, (p_2 = 0.00000)$<br>$\omega = \infty$                                            |
| 3 (discrete)      | 3                     | -4015.407265               | 1.81912              | 0.1158                     | $p_0 = 0.54898, (p_1 = 0.35404), p_2 = 0.09698$<br>$\omega_0 = 0.01390, \omega_1 = 0.13578, \omega_2 = 0.61991$ |
| 7 ( $\beta$ )     | 2                     | -4054.198096               | 1.80986              | 0.1162                     | $p = 0.33480, q = 2.45264$                                                                                      |
| 8 (B + $\omega$ ) | 4                     | -4054.328221               | 1.79949              | 0.5511                     | $p_0 = 0.99940, p = 0.33622, q = 2.45648,$<br>$(p_1 = 0.00060), \omega = 724.93092$                             |



**Supplemental Table 7.** Likelihoods and estimated parameters under different site models of codon substitution using the data set excluding the MADS-box. Abbreviations:  $-\ln L$ , log likelihood,  $p$ , parameter; Kappa (ts/tv), transition/transversion ratio; NA, non applicable;  $\omega$ , dN/dS value calculated under each model and applied to all branches in the phylogeny. Parameters in parenthesis are not free parameters.

| Site Model        | $p$ | $-\ln L$     | Kappa (ts/tv) | $\omega$ | Additional Parameters Calculated                                                                                |
|-------------------|-----|--------------|---------------|----------|-----------------------------------------------------------------------------------------------------------------|
| 0                 | 1   | -3842.679439 | 2.09356       | 0.1317   | NA                                                                                                              |
| 1a (neutral)      | 2   | -3784.514745 | 2.15909       | 0.1977   | $p_0 = 0.88116, (p_1 = 0.11884)$                                                                                |
| 2a (positive)     | 4   | -3784.514745 | 2.15909       | 0.1977   | $p_0 = 0.88116, p_1 = 0.11884, (p_2 = 0.00000)$<br>$\omega = \infty$                                            |
| 3 (discrete)      | 3   | -3770.470138 | 2.01294       | 0.1590   | $p_0 = 0.61960, (p_1 = 0.27508), p_2 = 0.10532$<br>$\omega_0 = 0.04262, \omega_1 = 0.20315, \omega_2 = 0.72797$ |
| 7 ( $\beta$ )     | 2   | -3777.500304 | 1.99916       | 0.1636   | $p = 0.54167, q = 2.70239$                                                                                      |
| 8 (B + $\omega$ ) | 4   | -3777.500402 | 1.99916       | 0.1636   | $p_0 = 1.00000, p = 0.54167, q = 2.70239$<br>$(p_1 = 0.00000), \omega = 6.48257$                                |

**Supplemental Table 8.** Likelihoods and estimated parameters under different site models of codon substitution using only the C-terminus. Abbreviations:  $-\ln L$ , log likelihood,  $p$ , parameter; Kappa (ts/tv), transition/transversion ratio; NA, non applicable;  $\omega$ , dN/dS value calculated under each model and applied to all branches in the phylogeny. Parameters in parenthesis are not free parameters.

| Site Model        | $p$ | $-\ln L$     | Kappa (ts/tv) | $\omega$ | Additional Parameters Calculated                                                                                                 |
|-------------------|-----|--------------|---------------|----------|----------------------------------------------------------------------------------------------------------------------------------|
| 0                 | 1   | -1640.637362 | 2.15397       | 0.1994   | NA                                                                                                                               |
| 1a (neutral)      | 2   | -1690.315486 | 3.46592       | 0.7867   | $p_0 = 0.21335$ , ( $p_1 = 0.78665$ )                                                                                            |
| 2a (positive)     | 4   | -1690.318441 | 3.46590       | 0.7866   | $p_0 = 0.21337$ , $p_1 = 0.78663$ , ( $p_2 = 0.00000$ )<br>$\omega = \infty$                                                     |
| 3 (discrete)      | 3   | -1618.117196 | 2.03426       | 0.2106   | $p_0 = 0.70167$ , ( $p_1 = 0.29833$ ),<br>$p_2 = 0.000000$<br>$\omega_0 = 0.10034$ , $\omega_1 = 0.46658$ , $\omega_2 = 999.000$ |
| 7 ( $\beta$ )     | 2   | -1614.406920 | 2.06628       | 0.2117   | $p = 0.76756$ , $q = 2.81030$                                                                                                    |
| 8 (B + $\omega$ ) | 4   | -1614.497092 | 2.06632       | 2.1553   | $p_0 = 0.99758$ , $p = 0.76772$ , $q = 2.81123$ , ( $p_l = 0.00242$ ), $\omega = 804.09372$                                      |

**Supplemental Table 9.** Hypothesis tested using likelihood ratio tests. Abbreviations:  $2\Delta \ln L$ , the likelihood ratio statistic; df, degrees of freedom (is the difference in the number of parameters calculated under the models being compared).

| Model                     | Data set   | H <sub>0</sub> (null)           | H <sub>1</sub> (alternate) | $2\Delta \ln L$ | df | <i>P</i> value ( $\chi^2$ ) |
|---------------------------|------------|---------------------------------|----------------------------|-----------------|----|-----------------------------|
| <b>Site Models</b>        |            |                                 |                            |                 |    |                             |
|                           | MIKC       |                                 |                            |                 |    |                             |
|                           |            | 0                               | 3                          | 227.60          | 4  | 0.000                       |
|                           |            | 1a                              | 2a                         | 0.00            | 2  | 1.000                       |
|                           |            | 7                               | 8                          | -0.26           | 2  | 1.000                       |
|                           | IKC        |                                 |                            |                 |    |                             |
|                           |            | 0                               | 3                          | 144.41          | 4  | 0.000                       |
|                           |            | 1a                              | 2a                         | 0.00            | 2  | 1.000                       |
|                           |            | 7                               | 8                          | 0.00            | 2  | 1.000                       |
|                           | C-terminus |                                 |                            |                 |    |                             |
|                           |            | 0                               | 3                          | 45.04           | 4  | 0.000                       |
|                           |            | 1a                              | 2a                         | 0.00            | 2  | 1                           |
|                           |            | 7                               | 8                          | -0.18           | 2  | 1                           |
| <b>Branch site Models</b> |            |                                 |                            |                 |    |                             |
|                           | IKC        | <b>Os <i>MADS17</i></b>         |                            |                 |    |                             |
|                           |            | Model A null                    | A                          | -12.46          | 2  | 1.000                       |
|                           |            | Model B null                    | B                          | -14.42          | 1  | 1.000                       |
|                           |            | <b><i>AGL6/Os MADS6</i></b>     |                            |                 |    |                             |
|                           |            | Model A null                    | A                          | -11.42          | 2  | 1.000                       |
|                           |            | Model B null                    | B                          | -14.42          | 1  | 1.000                       |
|                           |            | <b>Gain of palea expression</b> |                            |                 |    |                             |
|                           |            | Model A null                    | A                          | -10.19          | 2  | 1.000                       |
|                           |            | Model B null                    | B                          | -8.87           | 1  | 1.000                       |

**Supplemental Table 10.** Results from Tajima's relative rates test. The asterisk indicates *P* values less than 0.05 is often used to reject the null hypothesis of equal rates between lineages. dN/dS ratio was estimated using codeml as implemented in PAML 3.14 package (Yang 1997).

| <b>Test</b>                         | <b>Gene</b>      | <b>dN/dS = <math>\omega</math></b> | <b>Unique sites</b> | <b><i>P</i> value</b> |
|-------------------------------------|------------------|------------------------------------|---------------------|-----------------------|
| <i>ZAG5</i> vs <i>ZAG3</i>          | <i>ZAG5</i>      | 0.09049                            | 7                   | 0.36571               |
|                                     | <i>ZAG3</i>      | 0.08171                            | 4                   |                       |
| <i>Os MADS17</i> vs <i>Os MADS6</i> | <i>Os MADS17</i> | 0.57442                            | 25                  | 0.01963*              |
|                                     | <i>Os MADS6</i>  | 0.21785                            | 11                  |                       |

### **References not cited in the text but mentioned in the Supplemental Data**

**Nielsen, R., and Yang, Z.** (1998). Likelihood models for detecting positively selected amino acid sites and applications to the HIV-1 envelope gene. *Genetics* **148**: 929–936.

**Yang, Z., Nielsen, R., and Hasegawa, M.** (1998). Models of amino acid substitution and applications to mitochondrial protein evolution. *Mol. Biol. Evol.* **15**:1600-1611.

**Yang, Z., Nielsen, R., Goldman, N., and Pedersen, A.M.** (2000). Codon-substitution models for heterogeneous selection pressure at amino acid sites. *Genetics* **155**: 431–449.

**Zhao T., Ni, Z., Dai, Y., Yao, Y., Nie, X., and Sun, Q.** 2006 Characterization and expression of 42 MADS-box genes in wheat (*Triticum aestivum* L.). *Mol. Genet. Genomics* **276**: 334-350.
